# Supplementary material
Source: PubMed Central journal article supplement (PMC6556766)
Supplement: NIHMS1018788-supplement-Supplemental_Table_1.pdf [file NIHMS1018788-supplement-Supplemental_Table_1.pdf]

**Supplementary Table 1.** Characteristics of cohort for prospective study of menopause and incident kidney stones by menopausal status at study midpoint, 2003

|                                                | Pre-menopausal<br>(N=52,503) | Post-menopausal<br>(N=31,522) |
|------------------------------------------------|------------------------------|-------------------------------|
| Age (years), mean (SD)                         | 46 (4)                       | 52 (4)                        |
| Race, white                                    | 48,661 (93%)                 | 29,059 (92%)                  |
| Body mass index (kg/m <sup>2</sup> )           | 26.6 (6.2)                   | 27.6 (6.5)                    |
| Menopause etiology                             |                              |                               |
| Natural                                        |                              | 20,443 (65%)                  |
| Surgical                                       |                              | 10,139 (32%)                  |
| Radiation                                      |                              | 940 (3%)                      |
| Post-menopausal hormone therapy use            |                              |                               |
| Never                                          |                              | 9,846 (31%)                   |
| Past                                           |                              | 9,642 (31%)                   |
| Current                                        |                              | 11,517 (37%)                  |
| History of hypertension                        | 8,265 (16%)                  | 9,225 (29%)                   |
| History of diabetes                            | 1,297 (2.5%)                 | 1,641 (5.2%)                  |
| Thiazide use                                   | 1,881 (3.6%)                 | 2,250 (7.1%)                  |
| Fluid intake (L/day)                           | 1.7 (0.9)                    | 1.7 (1.0)                     |
| Supplemental calcium (mg/d), median (25%, 75%) | 200 (0, 662)                 | 500 (23, 1000)                |
| Total vitamin D intake (IU)                    | 452 (305)                    | 545 (343)                     |

Abbreviations: SD, standard deviation

\*Data are presented as % unless otherwise indicated. Dietary intake factors are presented as mean and standard deviation (SD) unless otherwise indicated.
