# Supplementary material
Source: PubMed Central journal article supplement (PMC6556766)
Supplement: NIHMS1018788-supplement-Supplemental_Table_2.pdf [file NIHMS1018788-supplement-Supplemental_Table_2.pdf]

**Supplemental table 2.** Age and multivariate adjusted relative risks for incident kidney stones by post-menopausal hormone use among post-menopausal women (1991-2013)

|                 | No hormone therapy use | Current use of hormone therapy | Past use of hormone therapy |
|-----------------|------------------------|--------------------------------|-----------------------------|
| Cases           | 355                    | 426                            | 254                         |
| Person-years    | 217,586                | 194,875                        | 141,726                     |
| Age-adjusted RR | 1.0 (ref)              | 1.21 (1.04 to 1.40)            | 1.10 (0.93 to 1.29)         |
| MV-adjusted RR  | 1.0 (ref)              | 1.11 (0.94 to 1.30)            | 1.06 (0.90 to 1.26)         |

Multivariate Model: Adjusted for age, body mass index, race, dietary factors (calcium, magnesium, potassium, sodium, animal protein, oxalate, vitamin D, vitamin C, alcohol, total fluid), supplemental calcium intake, thiazide, history of hypertension, history of diabetes mellitus, time since menopause

Abbreviations: MV, multivariate; RR, relative risk
