# Supplementary material
Source: PubMed Central journal article supplement (PMC6556766)
Supplement: NIHMS1018788-supplement-Supplemental_Table_3.pdf [file NIHMS1018788-supplement-Supplemental_Table_3.pdf]

**Supplementary Table 3.** Characteristics of urine cohort at pre- and post-menopausal time points (N=658)

|                                                  | Pre-menopause | Post-menopause |
|--------------------------------------------------|---------------|----------------|
| Age                                              | 50 (4.8)      | 57 (3.2)       |
| Body mass index                                  | 25 (5.0)      | 26 (5.1)       |
| Hypertension                                     | 55 (8%)       | 104 (16%)      |
| Diabetes                                         | 8 (1%)        | 16 (2%)        |
| Low bone density                                 | 50 (8%)       | 71 (11%)       |
| Kidney stones                                    | 143 (22%)     |                |
| Family history of kidney stones                  | 135 (21%)     |                |
| Bisphosphonate use                               | 9 (1%)        | 11 (2%)        |
| Thiazide use                                     | 25 (4%)       | 39 (6%)        |
| Proton pump inhibitor                            | 62 (9%)       | 89 (13%)       |
| Post-menopausal hormone therapy use              |               |                |
| Current                                          | N/A           | 105 (16%)      |
| Never                                            | N/A           | 481 (73%)      |
| Past                                             | N/A           | 67 (10%)       |
| Dietary calcium, mg/day                          | 943 (387)     | 942 (389)      |
| Calcium supplement, mg/day<br>(median, 25%, 75%) | 257 (0, 800)  | 500 (0, 1000)  |
| Vitamin D supplement, mg/day                     | 400 (0, 1000) | 628 (0, 1400)  |
| Total fluid intake, L/day                        | 1.8 (0.7)     | 1.7 (0.7)      |
| Urinary Variables                                |               |                |
| Creatinine, mg/d                                 | 1234 (221)    | 1287 (201)     |
| Calcium, mg/d                                    | 202 (88)      | 185 (87)       |
| Oxalate, mg/d                                    | 30 (11)       | 29 (10)        |
| Uric acid, mg/d                                  | 546 (142)     | 513 (125)      |

|                   |           |           |
|-------------------|-----------|-----------|
| Citrate, mg/d     | 806 (280) | 762 (279) |
| Potassium, meq/d  | 62 (20)   | 65 (21)   |
| Sodium, meq/d     | 141 (56)  | 124 (46)  |
| Magnesium, mg/d   | 105 (36)  | 105 (40)  |
| Phosphorus, mg/d  | 832 (255) | 753 (218) |
| pH                | 6.2 (0.5) | 6.2 (0.5) |
| Total Volume, L/d | 2.0 (0.8) | 2.1 (0.8) |

\*Data are presented as N(%) unless otherwise indicated. Dietary intake factors are presented as mean and standard deviation (SD) unless otherwise indicated.

Abbreviations: SD, standard deviation
