# Supplementary material
Source: PubMed Central journal article supplement (PMC6556766)
Supplement: NIHMS1018788-supplement-Supplemental_Table_4.pdf [file NIHMS1018788-supplement-Supplemental_Table_4.pdf]

**Supplementary Table 4.** Mean difference in urinary factors for the post- minus pre-menopausal collection (N=658)

| Variable         | Mean difference (95% CI) | P value |
|------------------|--------------------------|---------|
| Creatinine, mg/d | 53 (37 to 68)            | <0.001  |
| Calcium, mg/d    | -17 (-24 to -10)         | <0.001  |
| Oxalate, mg/d    | -0.7 (-1.7 to 0.2)       | 0.13    |
| Uric Acid, mg/d  | -33 (-43 to 22)          | <0.001  |
| Citrate, mg/d    | -43 (-63 to -25)         | <0.001  |
| Potassium, meq/d | 3 (1 to 4)               | <0.001  |
| Sodium, meq/d    | -17 (-21 to -13)         | <0.001  |
| Magnesium, mg/d  | -0.2 (-3 to 3)           | 0.90    |
| Phosphorus, mg/d | -79 (-101 to -58)        | <0.001  |
| pH               | -0.02 (-0.07 to 0.02)    | 0.34    |
| Volume, L/d      | 0.13 (0.07 to 0.18)      | <0.001  |

Abbreviations: CI, confidence intervals
